# Supplementary material for: Human bronchial epithelial cell‐derived extracellular vesicle therapy for pulmonary fibrosis via inhibition of TGF‐β‐WNT crosstalk
Source: PubMed Central journal article supplement (PMC8329991; doi:10.1002/jev2.12124), 2021-08-02
Supplement: JEV2-10-e12124-s001.pdf [file JEV2-10-e12124-s001.pdf]

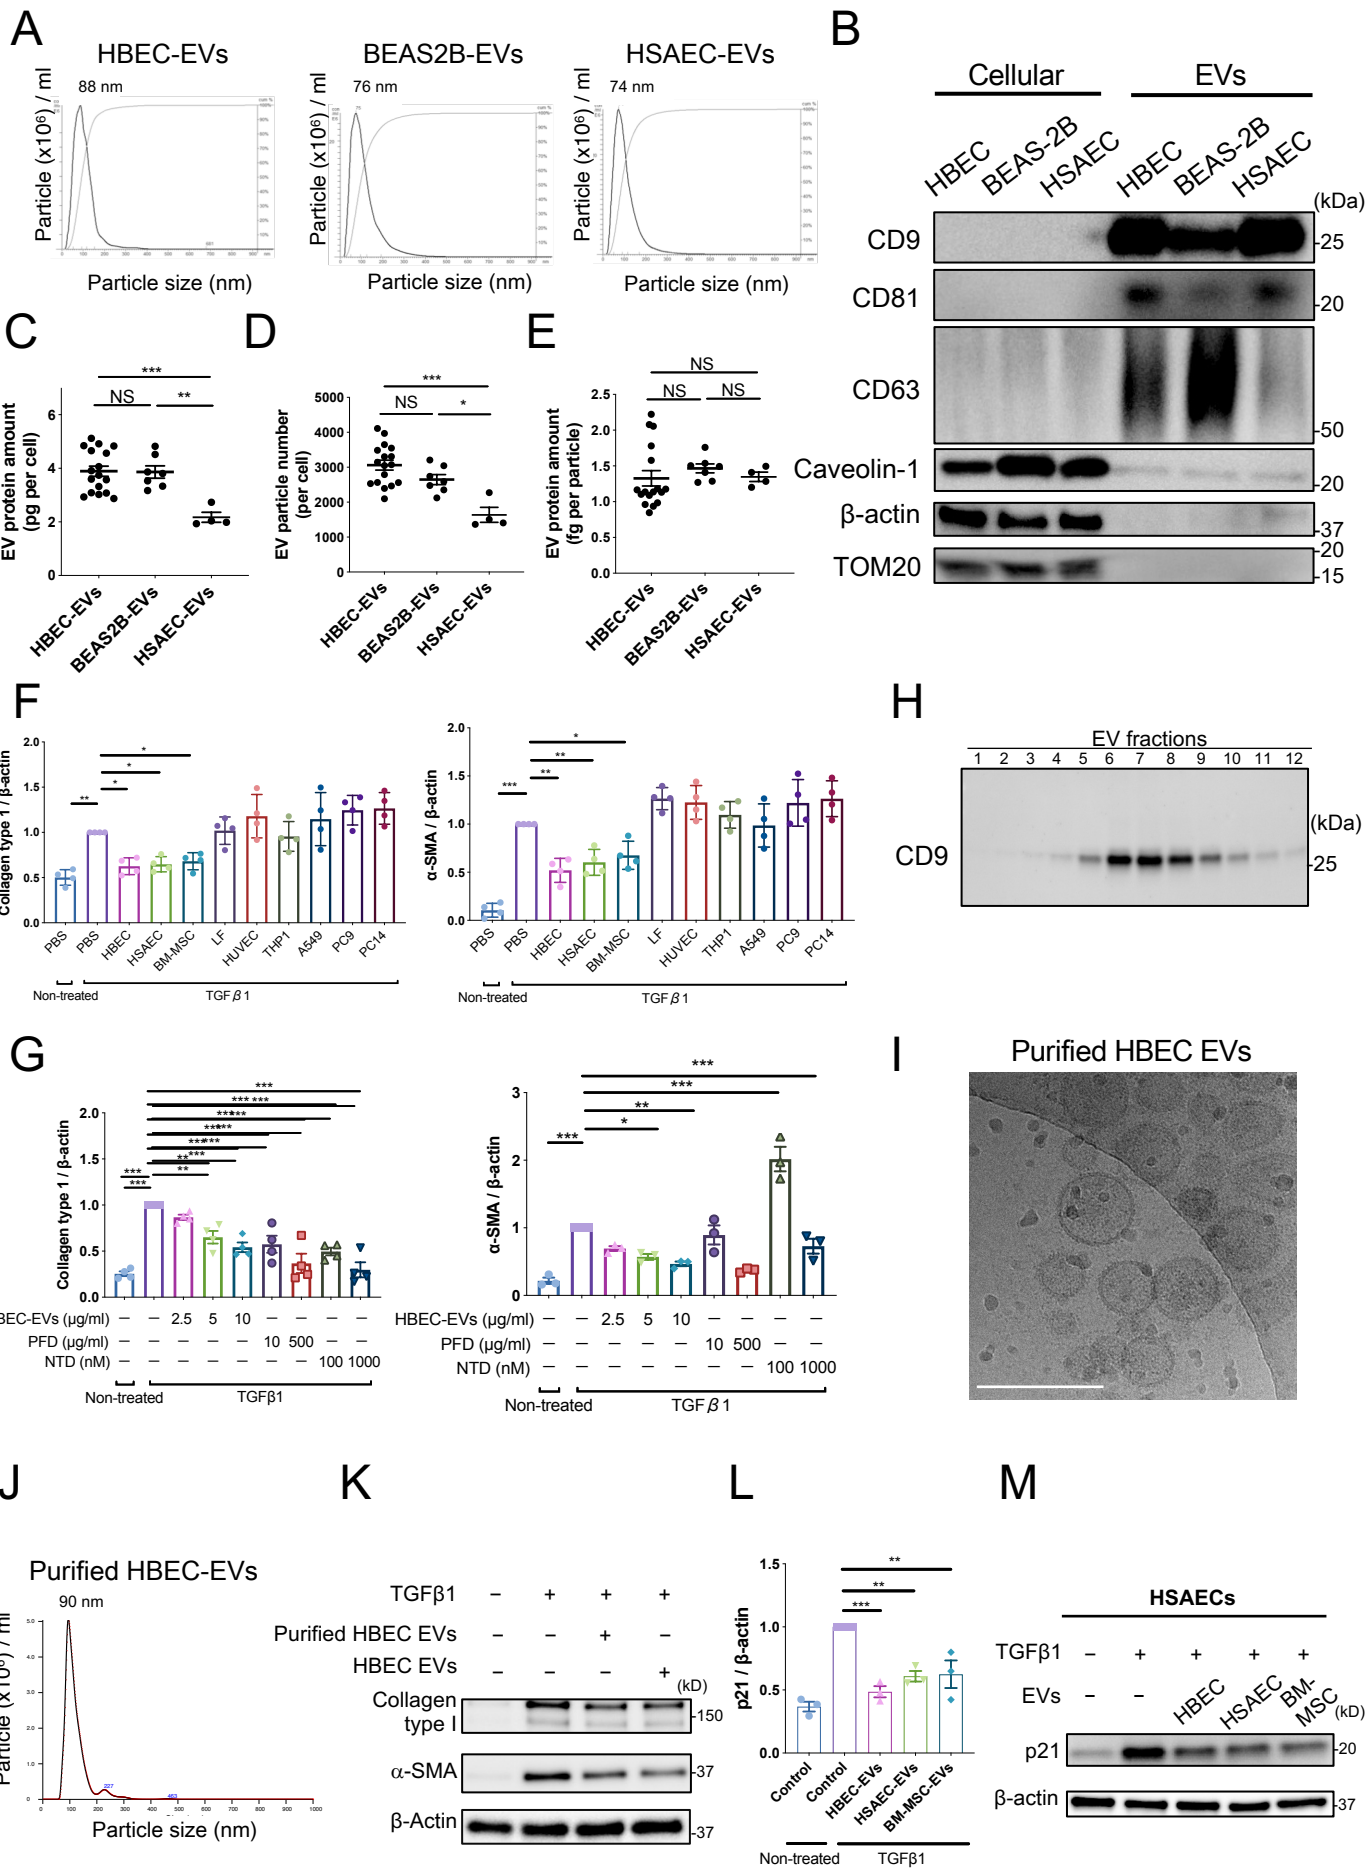

**Fig.S1**

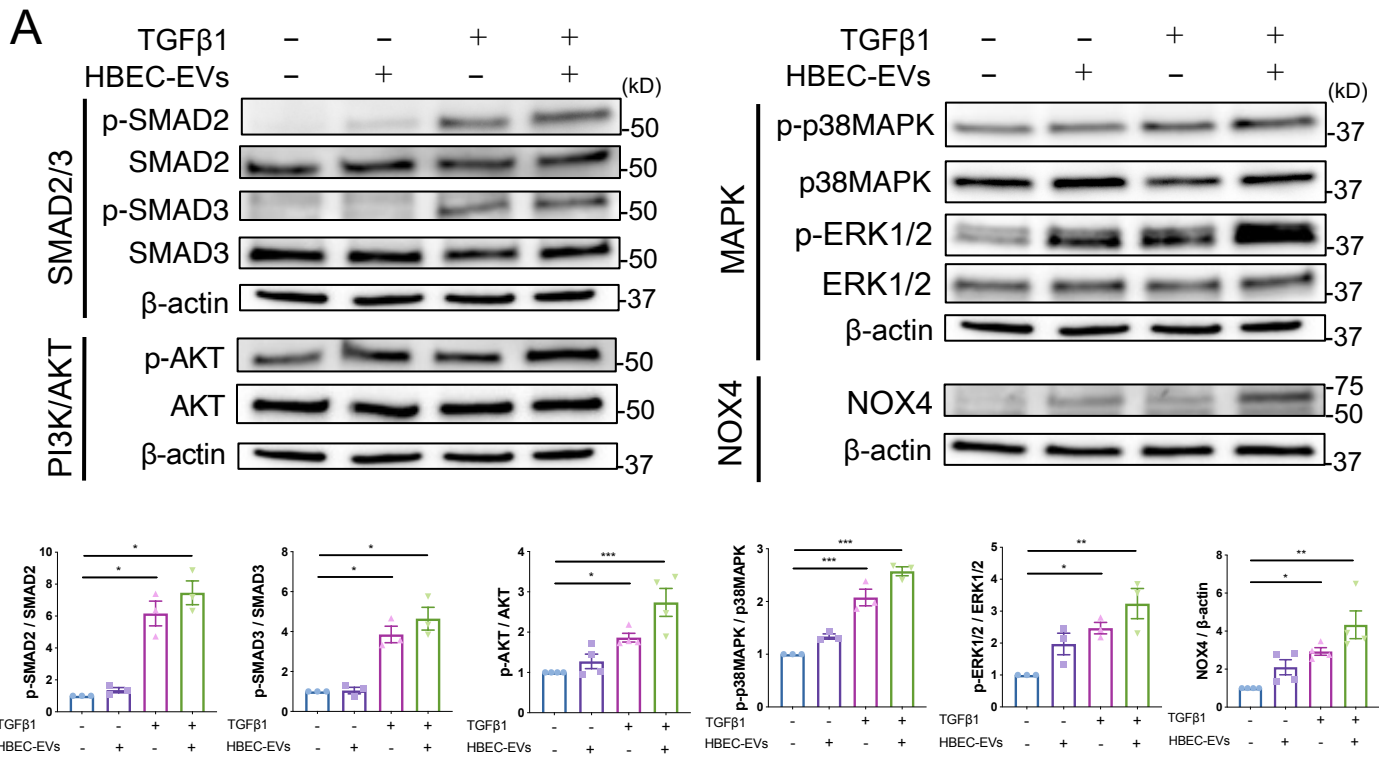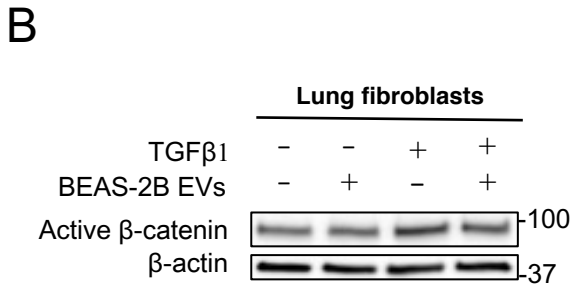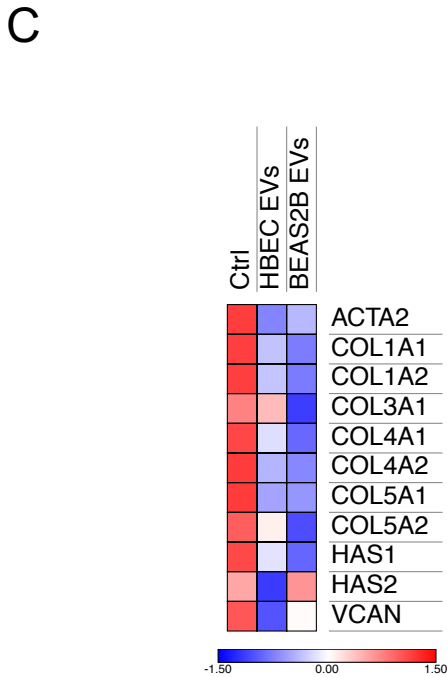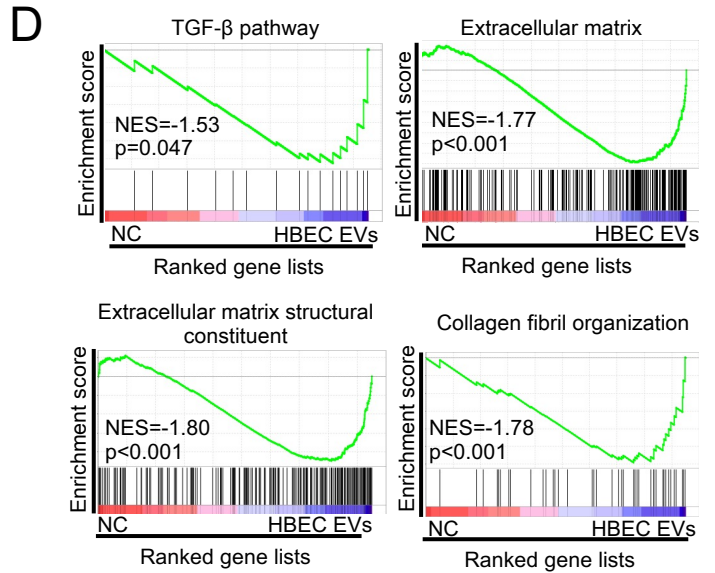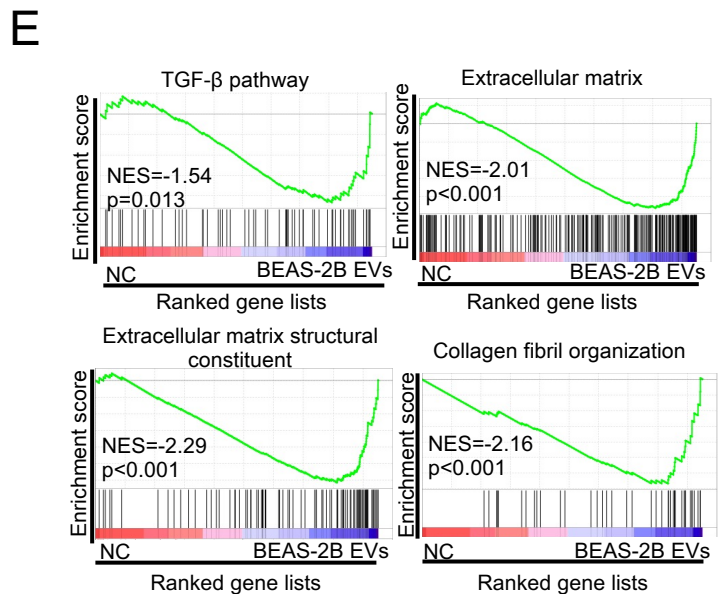

**Fig.S2**

**A**

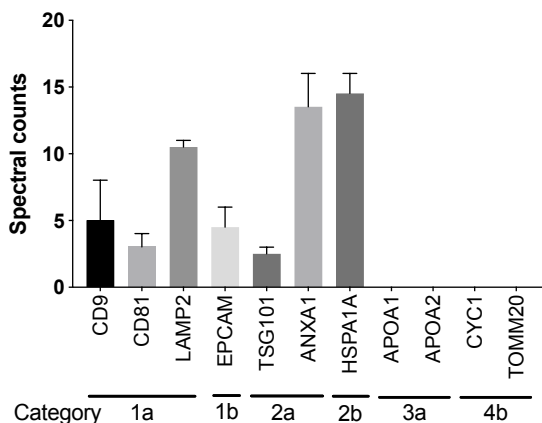

**B**

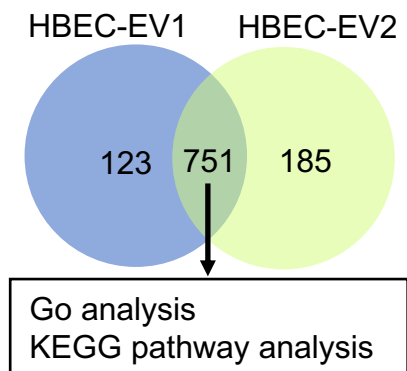

**C**

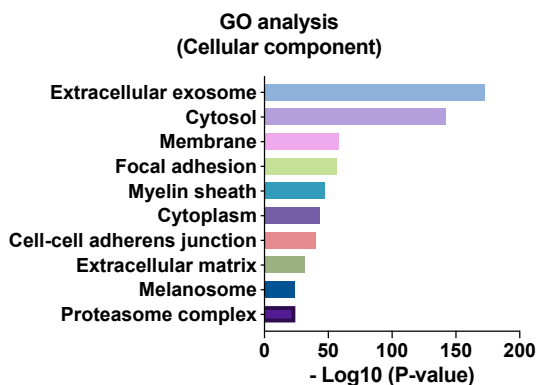

**D**

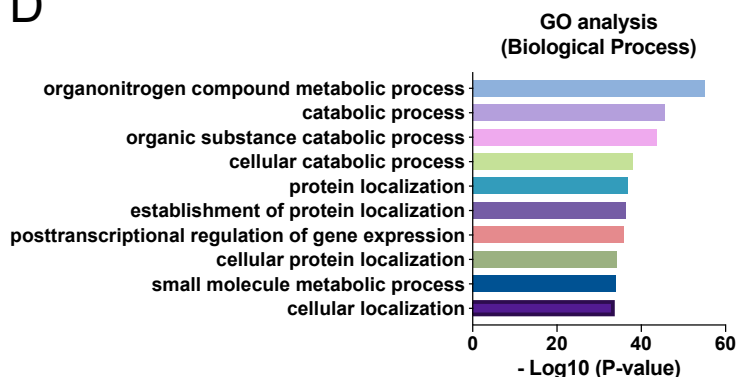

**E**

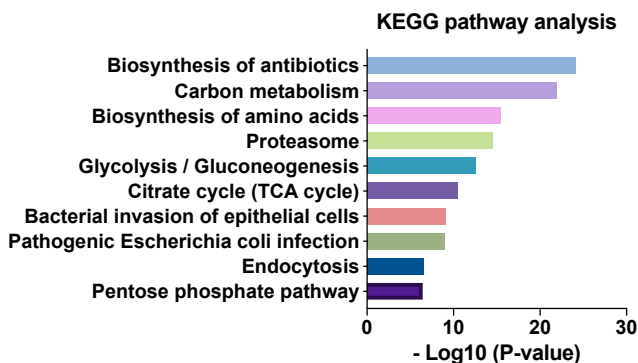

**F**

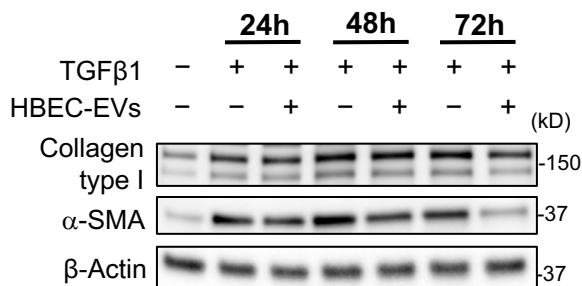

**Fig.S3**

**A**

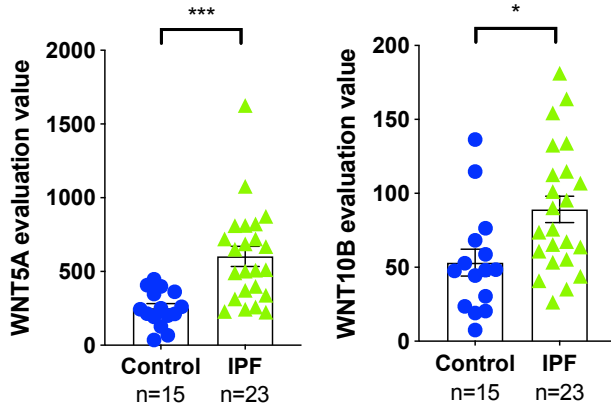

**B**

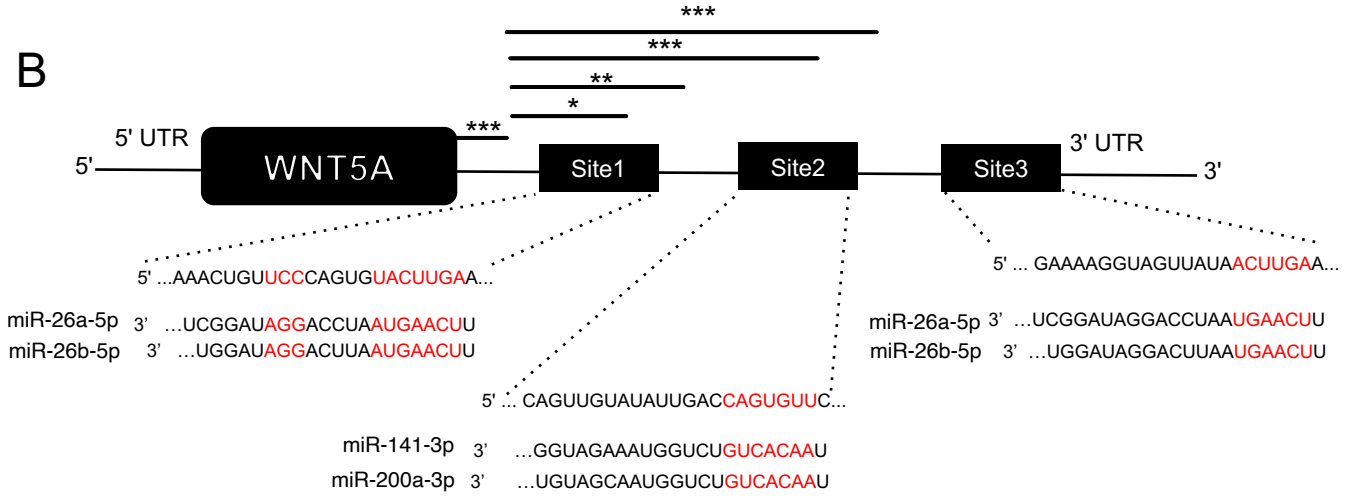

**C**

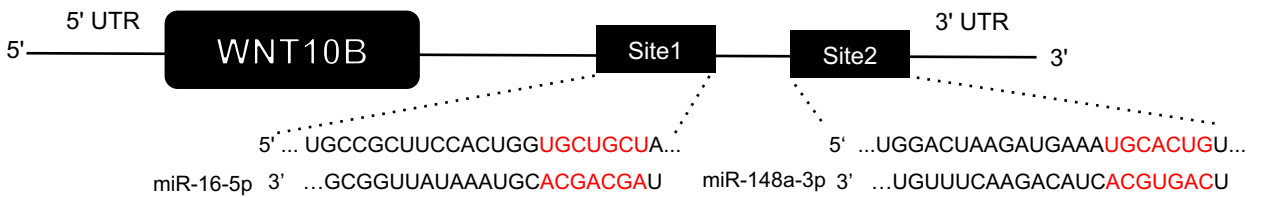

**Fig. S4**

**A**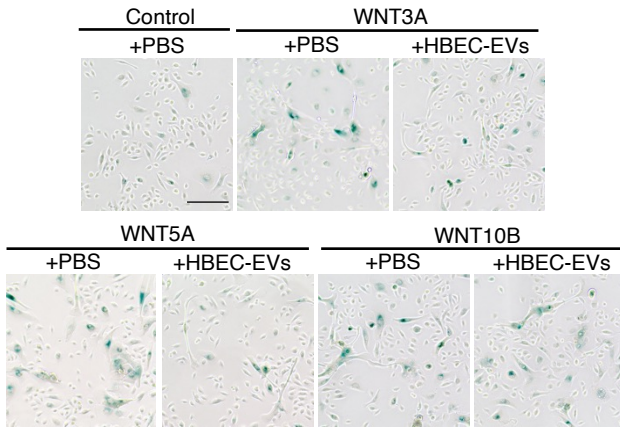**B**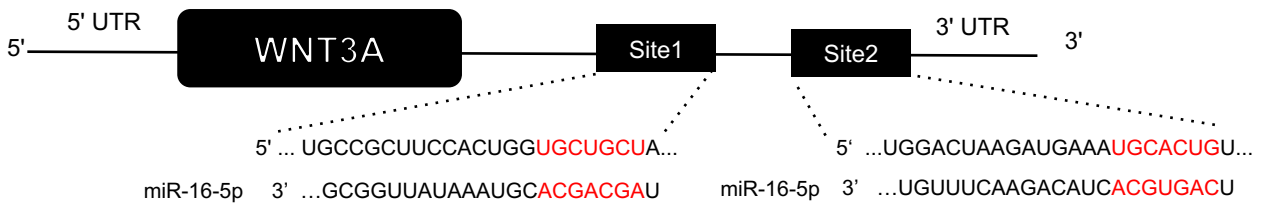**C**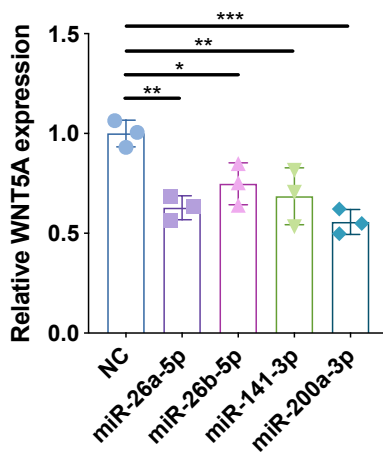**D**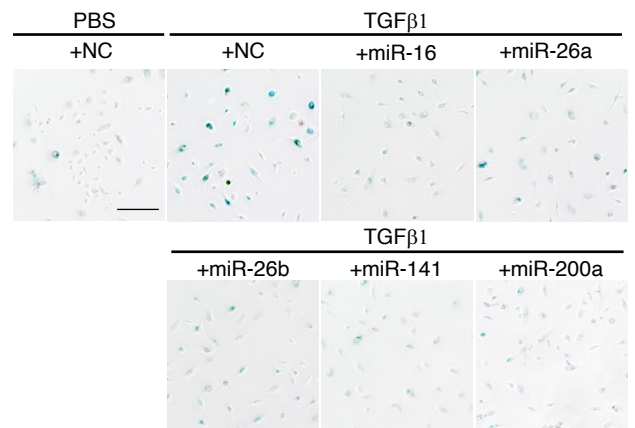**Fig.S5**

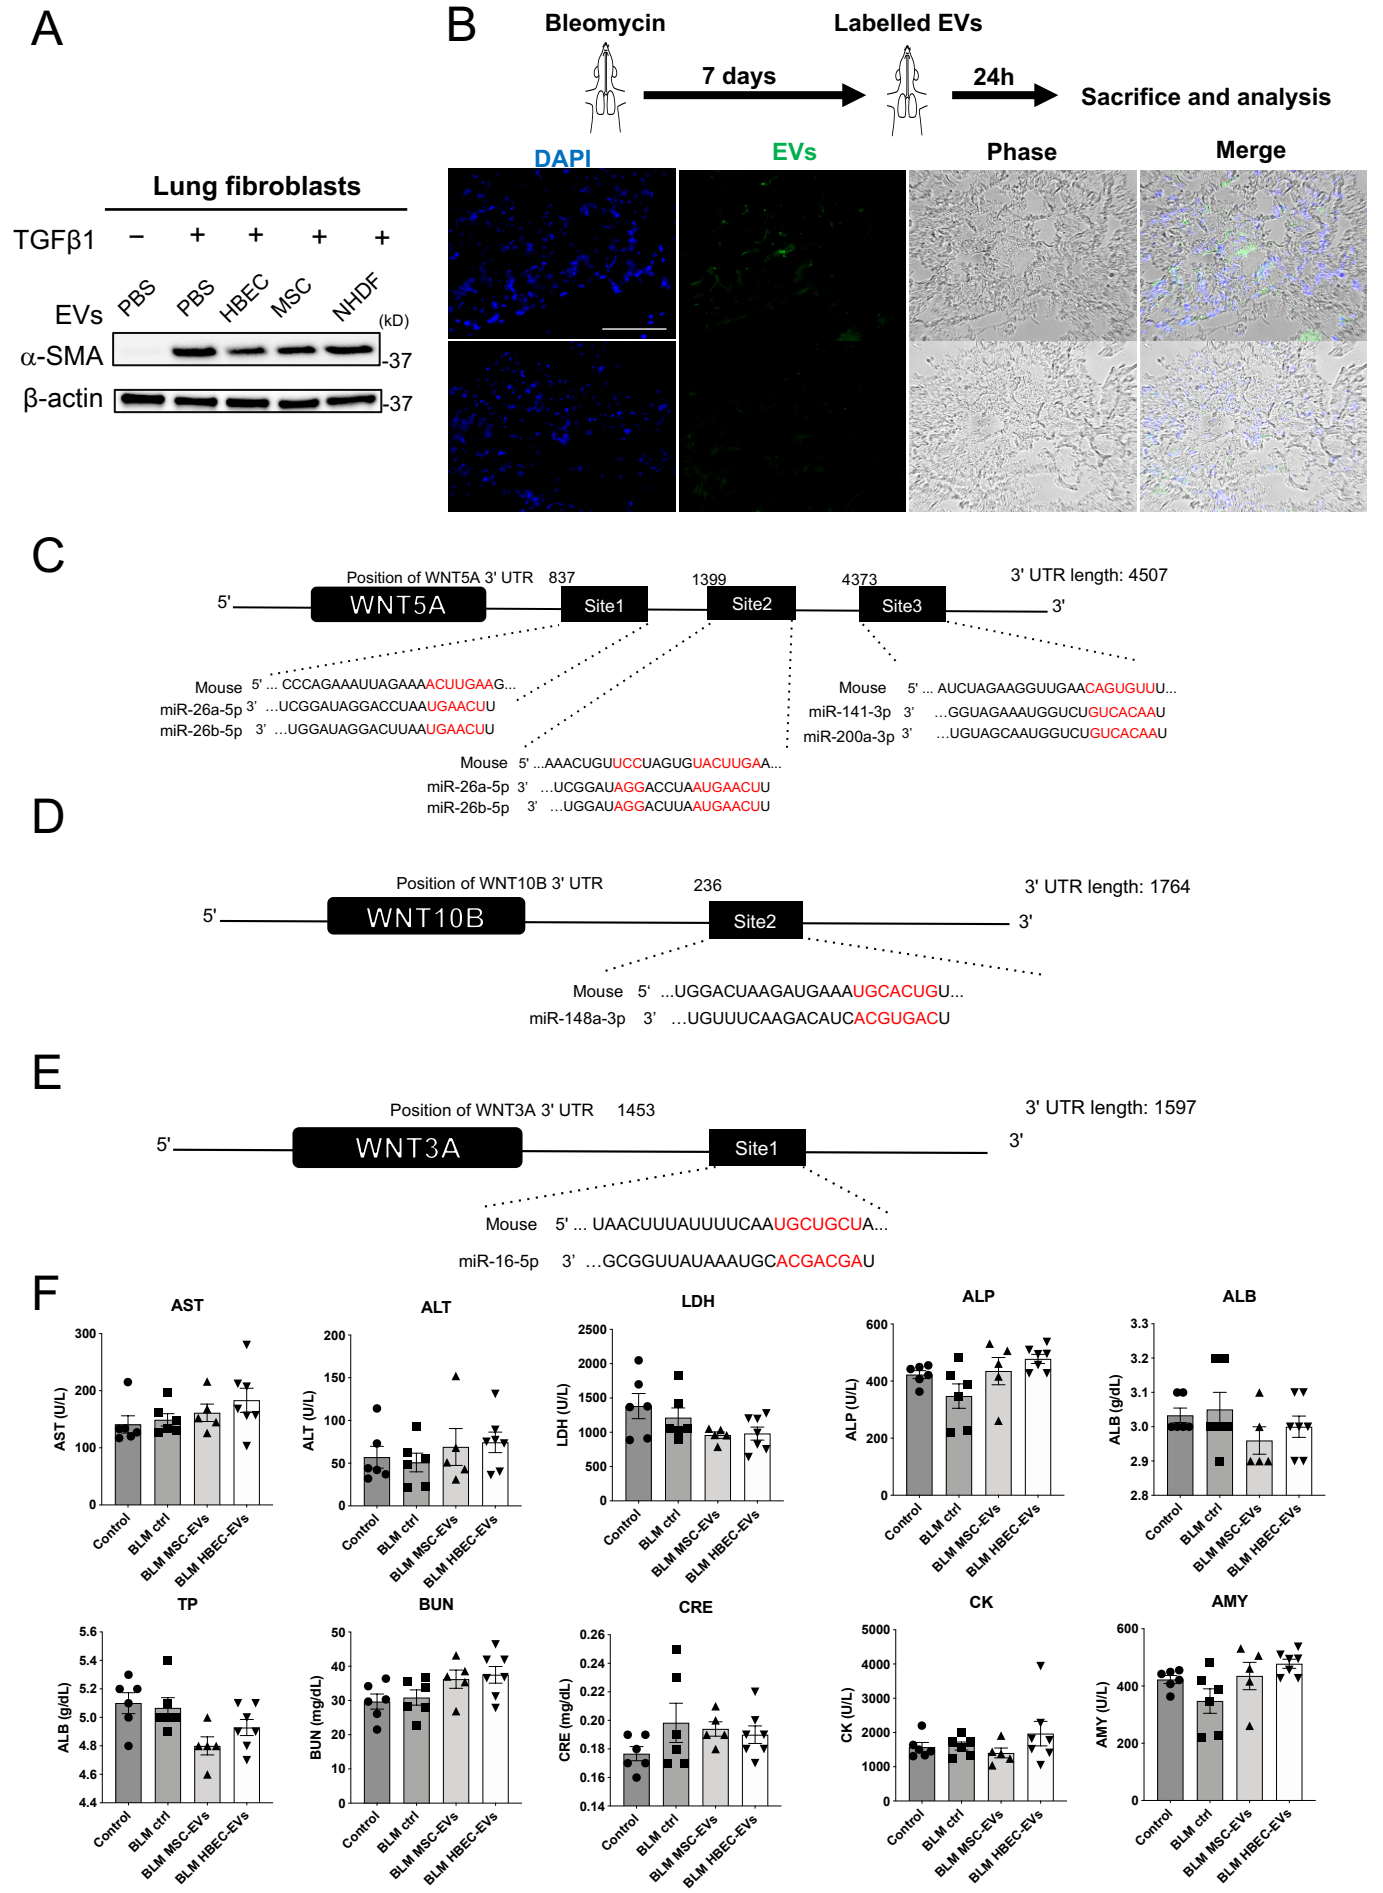

**Fig.S6**

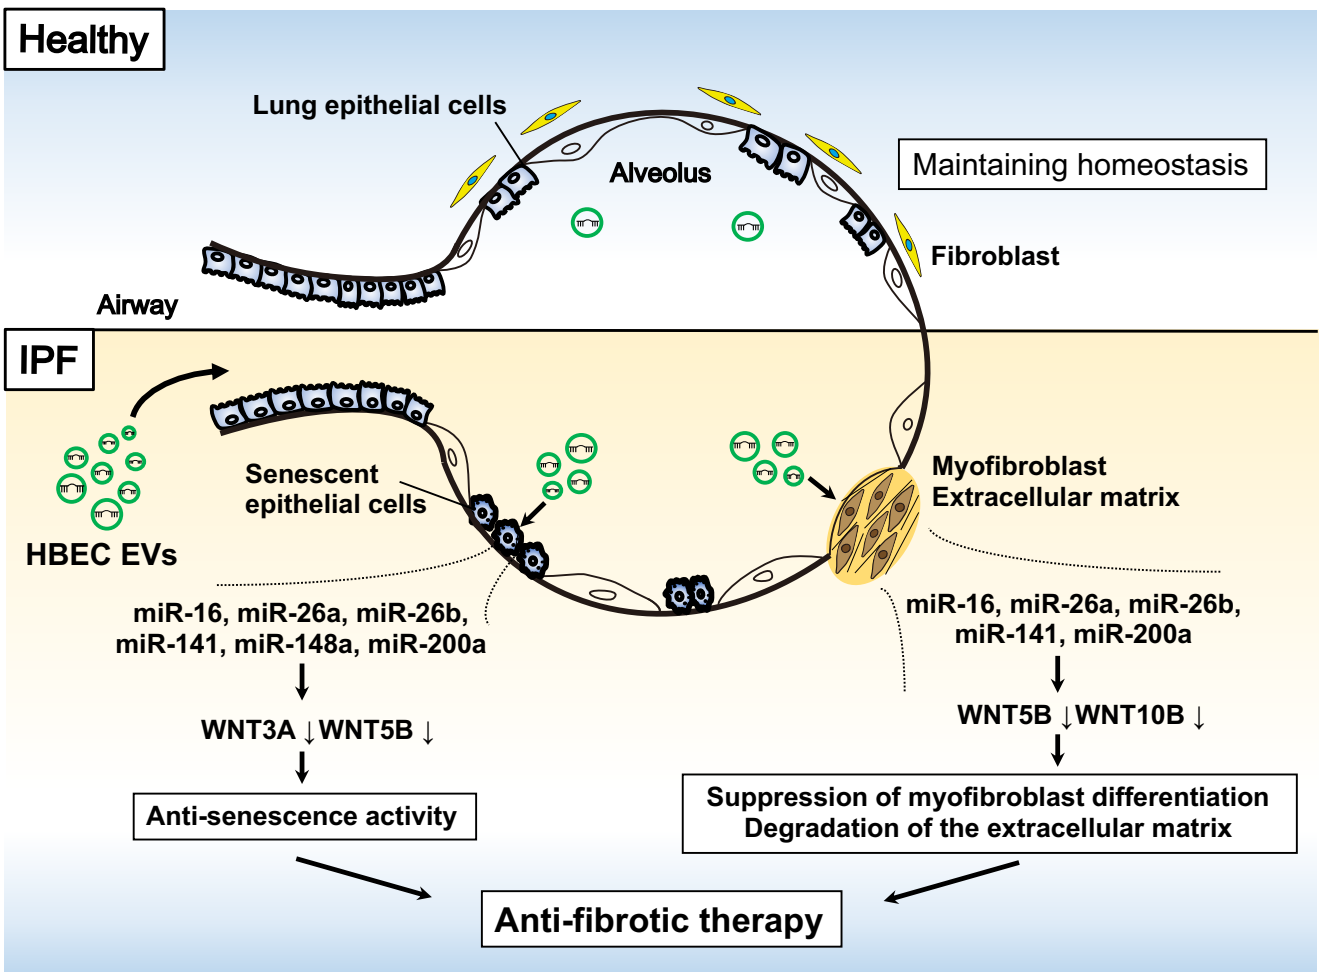

Fig.S7
